# Supplementary material
Source: ML conference proceedings conference paper supplement (https://proceedings.neurips.cc/paper_files/paper/2023/hash/3ec90b0eec9c1151c152ba865713f184-Abstract.html)
Supplement: Supplementary file 1 [file 3ec90b0eec9c1151c152ba865713f184-Supplemental-Conference.pdf]

## Supplementary Material

**Organization** In [Appendix A](#), we state some elementary probabilistic facts. The next two sections focus on proving our lemma on noisy location estimation. In [Appendix B](#), we prove some critical lemmas used in the proof, and in [Appendix C](#), we present the complete version of our location estimation algorithm, while addressing some typos in the main text. We mention some typos in footnotes and correct other minor typos without a mention.

Moving forward, in [Appendix D](#), we introduce an algorithm and prove a hardness result for the specific version of list-decodable mean estimation we consider, which differs from prior work. Finally, in [Appendix E](#), we state the final guarantees we can get for the problem of list-decodable stochastic optimization, incorporating our lemma from [Appendix D](#).

## A Elementary Probability Facts

In this section, we recall some elementary lemmas from probability theory.

**Lemma A.1** (Hoeffding). *Let  $X_1, \dots, X_n$  be independent random variables such that  $X_i \in [a_i, b_i]$ . Let  $S_n := \frac{1}{n} \sum_{i=1}^n X_i$ , then for all  $t > 0$*

$$\Pr[|S_n - \mathbf{E}[S_n]| \geq t] \leq \exp\left(-\frac{2n^2 t^2}{\sum_{i=1}^n (b_i - a_i)^2}\right).$$

**Lemma A.2** (Multivariate Chebyshev). *Let  $X_1, \dots, X_m$  be independent random variables drawn from  $D$  where  $D$  is a distribution over  $\mathbb{R}^d$  such that  $\mathbf{E}_{X \sim D}[X] = 0$  and  $\mathbf{E}_{X \sim D}[\|X\|^2] \leq \sigma^2$ . Let  $S_m := \frac{1}{m} \sum_{i=1}^m X_i$ , then for all  $t > 0$*

$$\Pr[\|S_m\| \geq t] \leq \sigma^2 / mt^2.$$

*Proof.* We first prove the following upper bound,

$$\begin{aligned} \Pr\left[\forall v \ \|v\| = 1. \ \left|\frac{1}{m} \sum_{i \in [m]} X_i \cdot v\right| > t\right] &< \frac{\mathbf{E}[\sum_{i \in [m]} |X_i \cdot v|^2]}{m^2 t^2} < \frac{\mathbf{E}[\sum_{i,j} (X_i \cdot v)(X_j \cdot v)]}{m^2 t^2} \\ &< \frac{\sum_{i,j} \mathbf{E}[(X_i \cdot v)(X_j \cdot v)]}{m^2 t^2} < \frac{\sum_i \mathbf{E}[(X_i \cdot v)^2]}{m^2 t^2} < \frac{\sum_i \mathbf{E}[\|X_i\|^2]}{m^2 t^2} \\ &< \frac{m\sigma^2}{m^2 t^2} = \frac{\sigma^2}{m t^2}. \end{aligned}$$

Since the inequality holds for all unit  $v$ , it also holds for the unit  $v$  in the direction of  $S_m$ , completing the proof.  $\square$

**Fact A.3** (Inflation via conditional probability). *Let  $y$  be a random variable with mean  $\mu$  and variance  $\sigma^2$  and let  $\xi$  be an arbitrary random variable independent of  $y$ , then*

$$\begin{aligned} \Pr[\xi \in (a, b)] &< (1 + 2/A^2) \Pr[\xi + y \in (a + \mu - \sigma A, b + \mu + \sigma A)] \\ &< (1 + 2/A^2) \Pr[\xi + y \in (a - |\mu| - |\sigma A|, b + |\mu| + |\sigma A|)]. \end{aligned}$$

*Proof.* To do this, we inflate the intervals and use conditional probabilities.

$$\begin{aligned} \Pr[\xi \in (a, b)] &= \Pr[\xi + y \in (a + \mu - \sigma A, b + \mu + \sigma A) \mid |y - \mu| < \sigma A] \\ &= \frac{\Pr[\xi + y \in (a + \mu - \sigma A, b + \mu + \sigma A) \text{ and } |y - \mu| < \sigma A]}{\Pr[|y - \mu| < \sigma A]} \\ &< (1 - 1/A^2)^{-1} \Pr[\xi + y \in (a + \mu - \sigma A, b + \mu + \sigma A) \text{ and } |y - \mu| < \sigma A] \\ &< (1 + 2/A^2) \Pr[\xi + y \in (a + \mu - \sigma A, b + \mu + \sigma A)]. \end{aligned}$$

The second inequality above follows from observing that we are simply lengthening the interval.

We will often use the second version for ease of analysis.  $\square$

## 511 B Useful Lemmas

512 In this section, we present some helpful lemmas for the algorithm on noisy one-dimensional location  
513 estimation.

514 To recap the setting: We can access samples from distributions  $\xi + y$  and  $\xi + y' + t$ . Here,  
515  $\Pr[\xi = 0] > \alpha$ ,  $y$  and  $y'$  are distributions with zero mean and bounded variance, and  $t \in \mathbb{R}$  is an  
516 unknown translation. Our objective is to estimate the value of  $t$ .

### 517 B.1 Useful Lemma for Rough Estimation

518 Our algorithm for one-dimensional location estimation consists of two steps. In the first step, we  
519 obtain an initial estimate of the shift between the two distributions by computing pairwise differences  
520 of samples drawn from each distribution. This involves taking the median of the distribution of  $x + y$ ,  
521 where  $x$  is symmetric and  $y$  has mean 0 and bounded variance.

522 The following lemma demonstrates that the median of this distribution is at most  $O(\sigma\alpha^{-1/2})$ , where  
523  $\sigma$  is the standard deviation of  $y$ . Furthermore, this guarantee cannot be improved.

524 **Fact B.1** (Median of Symmetric + Bounded-variance Distribution). *Let  $x$  be a random variable*  
525 *symmetric around 0 such that  $\alpha \in (0, 1)$ ,  $\Pr[x = 0] \geq \alpha$ . Let  $y$  be a random variable with mean 0*  
526 *and variance  $\sigma^2$ . If  $S$  is a set of  $O(1/\alpha^2 \log(1/\delta))$  samples drawn from the distribution of  $x + y$ ,*  
527  *$|\text{median}(S)| \leq O(\sigma\alpha^{-1/2})$ .*

528 *This guarantee is tight in the sense that there exist distributions for  $x$  and  $y$  satisfying the above*  
529 *constraints, such that  $\text{median}(x + y)$  can be as large as  $\Omega(\sigma\alpha^{-1/2})$ .*

530 *Proof.* We show that  $\Pr[x + y < -O(\sigma/\sqrt{\alpha})] < 0.5$  and  $\Pr[x + y > O(\sigma/\sqrt{\alpha})] < 0.5$ , as a result,  
531  $|\text{median}(x + y)| < O(\sigma/\sqrt{\alpha})$ . We will later transfer this guarantee to the uniform distribution over  
532 the samples.

533 Applying [Fact A.3](#) to the first probability, we see that  $\Pr[x + y < -O(\sigma/\sqrt{\alpha})] < (1 + \alpha) \Pr[x < -O(\sigma/\sqrt{\alpha})]$ .

535 Since  $\Pr[x = 0] \geq \alpha$ , we see that  $\Pr[x < 0] \leq 1/2 - \alpha$ ,

536 and so  $\Pr[x + y < -O(\sigma/\sqrt{\alpha})] < (1 + \alpha)(0.5 - \alpha) = 0.5 - \alpha + 0.5\alpha - \alpha^2 = 0.5 - 0.5\alpha - \alpha^2 < 0.5$ .

537 The upper bound follows similarly.

538 Since  $\Pr[x = 0] \geq \alpha$  and  $\Pr[|y| < O(\sigma/\sqrt{\alpha})] \geq 1 - \alpha$ , we see  $\Pr[|x + y| < O(\sigma/\sqrt{\alpha})] \geq \alpha/2$ .  
539 Hoeffding's inequality ([Lemma A.1](#)) now implies that the empirical median also satisfies the above  
540 upper bound as long as the number of samples is greater than  $O(1/\alpha^2 \log(1/\delta))$ .

541 To see that this is tight, consider the distribution centered at 0, whose density function is  $2/(y + 2)^3$   
542 in the range  $[1, \infty)$ , and is 0 otherwise.

543 Call this  $D_{y^{-3}}$ . Observe that  $\Pr_{D_{y^{-3}}}[z > t] < O(1) \int_t^\infty y^{-3} dy = C/t^2$ .

544 Let  $x$  be a symmetric distribution whose distribution takes the value 0 with probability  $\alpha$  and takes  
545 the values  $\pm\alpha^{-1/2}100C^{1/2} + 10$  with probability  $0.5(1 - \alpha)$ .

546 We show that the median of the distribution of  $x + y$  where  $y$  is drawn from  $D_{y^{-3}}$ , is larger than  
547  $\Omega(\alpha^{-1/2})$ .

548 To see this, we show that the probability that  $x + y$  takes a value smaller than  $100\alpha^{-1/2}C^{1/2}$  is less  
549 than half, implying that the median has to be larger than this quantity.

550  $x$  takes three values. Note that  $y + 100\alpha^{-1/2}C^{1/2} + 12$  places no mass in the region  
551  $(-\infty, 100\alpha^{-1/2}C^{1/2} + 10]$ . So to estimate the probability that  $x + y$  takes a value smaller than  
552  $100\alpha^{-1/2}C^{1/2} + 10$ , we only need to consider contributions from the other two possible values. By

553 choosing  $\alpha$  small enough, so that  $100\alpha^{-1/2}C^{1/2} > 10$ , we see

$$\begin{aligned}
& \Pr[x + y < 100\alpha^{-1/2}C^{1/2} + 10] \\
& < 0.5(1 - \alpha) \Pr[y < 200\alpha^{-1/2}C^{1/2} + 20] + \alpha \Pr[y < 100\alpha^{-1/2}C^{1/2} + 10] \\
& < 0.5(1 - \alpha)(1 - C/(200\alpha^{-1/2}C^{1/2} + 20)^2) + \alpha(1 - C/(100\alpha^{-1/2}C^{1/2} + 10)^2) \\
& < 0.5(1 - \alpha)(1 - \alpha^{1/2}/(400)^2) + \alpha \\
& < 0.5 + 0.5\alpha - \alpha^{1/2}/8 \cdot (400^2).
\end{aligned}$$

554 We are done when  $0.5\alpha - \alpha^{1/2}/8 \cdot (400^2) < 0$ , this happens for  $\alpha^{1/2} < 2/(8 \cdot (400^2))$ .  $\square$

## 555 B.2 Useful Lemma for Finer Estimation

556 In the second step of our location-estimation lemma, we refine the estimate of  $t$ . To do this, we first  
557 re-center the distributions based on our rough estimate, so that the shift after re-centering is bounded.  
558 Then, we identify an interval  $I$  centered around 0 such that, when conditioning on  $\xi + z$  falling within  
559 this interval, the expected value of  $\xi + z$  remains the same as when conditioning on  $\xi$  falling within  
560 the same interval. This expectation will help us get an improved estimate, which we use to get an  
561 improved re-centering of our original distributions, and repeat the process.

562 To identify such an interval, we search for a pair of bounded-length intervals equidistant from the  
563 origin (for e.g.  $(-10\sigma, -5\sigma)$  and  $(5\sigma, 10\sigma)$ ) that contain very little probability mass. By doing so,  
564 when  $z$  is added to  $\xi$ , the amount of probability mass shifted into the interval  $(-5\sigma, 5\sigma)$   $z$  remains  
565 small.

566 In this subsection, we prove [Lemma B.2](#), which states that any positive sequence which has a finite  
567 sum must eventually have one small element. The lemma also gives a concrete upper bound on which  
568 element of the sequence satisfies this property.

569 **Lemma B.2.**  $a_i \geq 0$  for all  $i$  and  $\sum_{i=1}^{\infty} a_i < C$  for some constant  $C$ . Also, suppose we have  
570  $\eta \in [0, 1]$ . Then there is an  $i$  such that  $1 \leq L < i < (C/a_0 + L)^{1/\eta}$  such that  $ia_i < \eta \sum_{j=1}^i a_j$ .

571 Consider a partition of the reals into length  $L$  intervals. In our proof, we will use [Lemma B.2](#) on the  
572 sequence  $a_i$ , where  $a_i$  corresponds to an upper bound on the mass of  $\xi$  contained in the  $i$ -th intervals  
573 equidistant from the origin on either side, and the mass that crosses them (i.e., the mass of  $\xi$  that is  
574 moved either inside or out of the interval when  $z$  is added to it).

575 We need the following calculation to prove [Lemma B.2](#).

576 Notation: For integer  $i \geq 1$  and  $\eta \in (0, 1)$ , define  $(i - \eta)! := \prod_{j=1}^i (j - \eta)$ .

577 **Fact B.3.** Let  $A_k := 1 + \sum_{t=1}^{k-1} \frac{\eta(t-1)!}{(t-\eta)!}$ . Then, for  $k \geq 2$ ,  $A_k = (k-1)!/(k-1-\eta)!$ .

578 *Proof.* We prove this by induction. By definition, our hypothesis holds for  $A_2$  because  $A_2 =$   
579  $1 + \eta/(1-\eta) = 1/(1-\eta) = (2-1)!/(2-1-\eta)!$ . Suppose it holds for all  $2 \leq t \leq k$ . We then  
580 show that it holds for  $t = k+1$ .

$$\begin{aligned}
A_{k+1} &= 1 + \sum_{t=1}^k \frac{\eta(t-1)!}{(t-\eta)!} = A_k + \frac{\eta(k-1)!}{(k-\eta)!} \\
&= \frac{(k-1)!}{(k-1-\eta)!} + \frac{\eta(k-1)!}{(k-\eta)!} = \frac{(k-1)!}{(k-1-\eta)!} \left(1 + \frac{\eta}{k-\eta}\right) \\
&= \frac{(k-1)!}{(k-1-\eta)!} \frac{k}{k-\eta} = \frac{k!}{(k-\eta)!}.
\end{aligned}$$

581  $\square$

582 *Proof of [Lemma B.2](#)* Let  $U = (C/a_0 + L)^{1/\eta}$  and suppose towards a contradiction that there is  
583 no such  $i$  that satisfies the lemma. Specifically, all integers  $i \in [1, U]$ , we will assume that for  
584  $ia_i \geq \eta \sum_{j=1}^i a_j$ . We then show that this implies  $i^{1-\eta}a_i \geq \eta a_0$  for all  $i$  in the range.

585 Consider the inductive hypothesis on  $t$  given by  $a_t \geq \eta \frac{(t-1)!}{(t-\eta)!} \cdot a_0$ . The base case when  $t = 1$  is true  
 586 since  $a_1 \geq \eta a_0 / (1 - \eta)$  by our assumption. Suppose the inductive hypothesis holds for integers  
 587  $t \in [1, k-1]$ . We show this for  $t = k$  below.

$$\begin{aligned} a_k &\geq \frac{\eta}{k - \eta} \sum_{t=0}^{k-1} a_t \\ &\geq \frac{a_0 \eta}{k - \eta} \left( 1 + \sum_{t=1}^{k-1} \frac{\eta(t-1)!}{(t-\eta)!} \right) \\ &= a_0 \eta \frac{(k-1)!}{(k-\eta)!}. \end{aligned}$$

588 The final equality follows from [Fact B.3](#) which states that  $(k-1)!/(k-1-\eta)! = 1 + \sum_{t=1}^{k-1} \frac{\eta(t-1)!}{(t-\eta)!}$ .  
 589 Simplifying this further, we see that since  $(i-\eta) \geq i \exp(-\eta/i)$  for all  $i \in [1, k]$ ,

$$\begin{aligned} a_k &\geq a_0 \eta \frac{(k-1)!}{(k-\eta)!} \\ &\geq a_0 \eta \frac{(k-1)!}{k! \exp(-\eta/k)} \\ &\geq a_0 \eta (1/k) (1/\exp(-\eta(\sum_{i=1}^k 1/i))) \\ &\geq a_0 \eta (1/k) (1/\exp(-\eta \log(k)/20)) \\ &\geq (a_0/2) \eta (1/k^{1-\eta/20}). \end{aligned}$$

590 Finally, observe that

$$\begin{aligned} C &= \sum_{i=L}^U a_i > a_0 \eta \sum_{i=L}^U (1/i^{1-\eta/20}) \\ &> a_0 \eta \int_L^U (1/x^{1-\eta}) dx \\ &= a_0 (U^\eta - L^\eta). \end{aligned}$$

591 If  $a_0 (U^\eta - L^\eta) > C$ , we have a contradiction, since  $\sum_{i=L}^\infty a_i < C$ . This follows when  $U >$   
 592  $(C/a_0 + L)^{1/\eta}$ .  $\square$

## 593 C Noisy Location Estimation

594 In this section, we state and prove the guarantees of our algorithms for noisy location estimation  
 595 ([Lemma 3.1](#) and [Lemma 3.5](#)).

### 596 C.1 One-dimensional Noisy Location Estimation

597 Throughout the technical summary and some parts of the proof, we make the assumption that the  
 598 variables  $y$  and  $y'$  were bounded. Extending this assumption to bounded-variance distributions  
 599 requires significant effort.

600 Our algorithm for one-dimensional noisy location estimation ([Algorithm 4](#)) can be thought of as a  
 601 two-step process. The first step involves a rough initial estimation algorithm, while the second step  
 602 employs an iterative algorithm that progressively refines the estimate by a factor of  $\eta$  in each iteration.

603 Due to space limitations and for ease of exposition, the algorithm we present in the main body is a  
 604 sketch of the refinement procedure.

605 In this [Algorithm 4](#), we introduce the definition of  $\hat{P}$  (the empirical estimate of  $\tilde{P}(\cdot)$ ), which is an  
 606 upper bound on the probability mentioned earlier. This probability can be calculated using samples

607 from  $\xi + z$  and  $\xi + z'$ . Additionally, we incorporate the iterative refinement process within the  
 608 algorithm.

---

**Algorithm 4** One-dimensional Location Estimation: Shift1D( $S_1, S_2, \eta, \sigma, \alpha$ )

---

**Input:** Sample sets  $S_1, S_2 \subset \mathbb{R}^d$  of size  $m$ ,  $\alpha, \eta \in (0, 1)$ ,  $\sigma > 0$

1. Let  $T = O(\log_{1/\eta}(1/\alpha))$ . For  $j \in \{1, 2\}$ , partition  $S_j$  into  $T$  equal pieces,  $S_j^{(i)}$  for  $i \in [T]$ .
2.  $D = \{a - b \mid a \in S_1^{(1)}, b \in S_2^{(1)}\}$ .
3.  $t'(1) := \text{median}(D)$ .
4. Set  $A = O(1/\sqrt{\alpha})$ .
5. Repeat steps 6 to 12, for  $i$  going from 2 to  $T$ :
6.  $S_1^{(i)} := S_1^{(i)} - t'_r(i-1)$ .
7. For  $j \in \{1, 2\}$

$$\begin{aligned} \hat{P}_j(i) &:= O(1) \Pr_{x \sim S_j^{(i)}} [|x| \in A\sigma(i-5, i+5)] \\ &\quad + O(1) \sum_{j=1}^{i-1} (1/(i-j)^2) \Pr_{x \sim S_j^{(i)}} [|x| \in Aj\sigma + A\sigma[-4, 5)]. \end{aligned}$$

8. Let  $\hat{P}(i) = \hat{P}_1(i) + \hat{P}_2(i)$ .
9. Identify an integer  $k \in [1/(\alpha\eta), (O(1)/\alpha\eta)^{1/\eta}]$  such that

$$\hat{P}(k) \leq \eta \sum_{j \in \{1, 2\}} \Pr_{x \sim S_j^{(i)}} [|x| \in A\sigma k] \pm O(\eta/i).$$

10.  $t'(i) := t'(i-1) + \mathbf{E}_{z \sim S_1^{(i)}} [z \mid |z| \leq A\sigma k] - \mathbf{E}_{z \sim S_2^{(i)}} [z \mid |z| \leq A\sigma k]$ .
  12.  $A := \eta A$ .
  11. Return  $t'(T)$
- 

609 **Lemma C.1** (One-dimensional location-estimation). *There is an algorithm (Algorithm 4) which,*  
 610 *given  $\text{poly}((O(1)/\eta\alpha)^{1/\eta}, \log(1/\delta\eta\alpha))$  samples of the form  $\xi + y + t$  and  $\xi + y'$ , where  $t \in \mathbb{R}$  is*  
 611 *an unknown translation, runs in time  $\text{poly}((O(1)/\eta\alpha)^{1/\eta}, \log(1/\delta\eta\alpha))$  and recovers  $t'$  such that*  
 612  *$|t - t'| \leq O(\eta\sigma)$ .*

613 *Proof.* Our proof is based on the following claims:

614 **Claim C.2** (Rough Estimate). *There is an algorithm which, given  $m = O((1/\alpha^4) \log(1/\delta))$*   
 615 *samples of the kind  $\xi + y + t$  and  $\xi + y'$ , where  $t \in \mathbb{R}$  is an unknown translation, returns  $t'_r$  satisfying*  
 616  *$|t'_r - t| < O(\sigma\alpha^{-1/2})$ .<sup>2</sup>*

**Claim C.3** (Fine Estimate). *Suppose  $z, z'$  have means bounded from above by  $A\sigma$*   
*and variances at most  $\sigma^2$  and suppose  $\alpha \in (0, 1)$  and  $\eta \in (0, 1/2)$ . Then in*  
 *$\text{poly}((O(1)/\alpha\eta)^{1/\eta}, \log(1/\delta\eta\alpha))$  samples and  $\text{poly}((O(1)/\alpha\eta)^{1/\eta}, \log(1/\delta\eta\alpha))$  time, it is possible*  
*to recover  $k \in [1/\eta\alpha, (O(1)/\eta\alpha)^{O(1/\eta)}]$  such that*

$$\widehat{\mathbf{E}}[\xi + z \mid |\xi + z| \leq A\sigma k] - \widehat{\mathbf{E}}[\xi + z' \mid |\xi + z'| \leq A\sigma k] = \mathbf{E}[z] - \mathbf{E}[z'] \pm \eta(A\sigma).$$

617 Using Claim 3.2, we first identify a rough estimate  $t'_r$  satisfying  $|t'_r - t| < O(\sigma\alpha^{-1/2})$ . This allows  
 618 us to re-center  $y'$ . Let the re-centered distribution be denoted by  $z' = y'$  and  $z = y + t - t'_r$ . Then  $z$   
 619 and  $z'$  are such that  $\mathbf{E}[z]$  and  $\mathbf{E}[z']$  are both at most  $O(\sigma\alpha^{-1/2})$  in magnitude, and have variance at  
 620 most  $\sigma^2$ .

621 Claim 3.4 then allows us to estimate  $t'_f$  such that  $|(\mathbf{E}[z] - \mathbf{E}[z']) - t'_f| = |t - t'_r - t'_f| \leq \eta O(\sigma\alpha^{-1/2})$ .

622 Setting  $t' = t'_r + t'_f$ , we see that our estimate  $t'$  is now  $\eta$  times closer to  $t$  compared to  $t'_r$ .

---

<sup>2</sup>Typo in main body: Missing  $\alpha^{-1/2}$  term.

623 To refine this estimate further, we can obtain fresh samples and re-center using  $t'$  instead of  $t'_r$ .  
 624 Repeating this process  $O(\log_{1/\eta}(1/\alpha)) = O(\log_\eta(\alpha))$  times is sufficient to obtain an estimate that  
 625 incurs an error of  $\eta \cdot \eta^{\log_\eta(\alpha^{1/2})} \cdot O(\sigma\alpha^{-1/2}) \leq O(\eta\sigma)$ .

626 This results in a runtime and sample complexity that is only  $O(\log_{1/\eta}(1/\alpha))$  times the runtime and  
 627 sample complexity required by [Claim 3.4](#). This amounts to the final runtime and sample complexity  
 628 being  $\text{poly}((O(1)/\alpha\eta)^{1/\eta}, \log(1/\delta\eta\alpha))$ .

629 We now prove [Claim 3.2](#) and [Claim 3.4](#).

630 [Claim 3.2](#) shows that the median of the distribution of pairwise differences of  $\xi + y + t$  and  $\xi + y'$   
 631 estimates the mean up to an error of  $\sigma\alpha^{-1/2}$ .

632 *Proof of Claim 3.2* Let  $\tilde{\xi}$  be a random variable with the same distribution as  $\xi$  and independently  
 633 drawn. We have independent samples from the distributions of  $\xi + y + t$  and  $\xi + y'$ . Applying  
 634 [Fact B.1](#) to these distributions, we see that if we have at least  $O(1/\alpha^4) \log(1/\delta)$  samples from the  
 635 distribution of  $(\xi - \tilde{\xi}) + (y - y') + t$ , these samples will have a median of  $t \pm O(\sigma/\sqrt{\alpha})$ .  $\square$

636 *Proof of Claim 3.4* To identify such a  $k$ , the idea is to ensure that  $\mathbf{E}[\xi + z \mid |\xi + z| \leq A\sigma k] =$   
 637  $\mathbf{E}[\xi + z \mid |\xi| \leq A\sigma k] \pm O(A\eta\sigma) = \mathbf{E}[\xi \mid |\xi| \leq A\sigma k] + \mathbf{E}[z] \pm O(A\eta\sigma)$ , and similarly for  $z'$ . The  
 638 theorem follows by taking the difference of these equations.

639 Before we proceed, we will need the following definitions: let  $P(i, z)$  be defined as follows:

$$P(i, z) := \Pr[|\xi| \in A\sigma(i-1, i+1)] \\ + \Pr[|\xi| < Ai\sigma, |\xi + z| > Ai\sigma] + \Pr[|\xi| > Ai\sigma, |\xi + z| < Ai\sigma].$$

640 This will help us bound the final error terms that arise in the calculation. We will need the following  
 641 upper bound on  $P(i, z) + P(i, z')$ .

642 **Claim C.4.** *There exists a function  $\tilde{P} : \mathbb{N} \rightarrow \mathbb{R}^+$  satisfying:*

- 643 1. *For all  $i \in \mathbb{N}$ ,  $\tilde{P}(i) \geq P(i, z) + P(i, z')$  which can be computed using samples from  $\xi + z$*   
 644 *and  $\xi + z'$ .*
- 645 2. *There is a  $k \in [(1/\alpha\eta), (C/\alpha + 1/\alpha\eta)^{1/\eta}]$  such that  $k\tilde{P}(k) < \eta \sum_{j=1}^k \tilde{P}(j)$ .*
- 646 3.  $\sum_{j=1}^k \tilde{P}(j) = O(\Pr[|\xi + z| \leq A\sigma k] + \Pr[|\xi + z'| \leq A\sigma k])$ .
- 647 4. *With probability  $1 - \delta$ , for all  $i < (O(1)/\eta\alpha)^{O(1)/\eta}$ ,  $\tilde{P}(i)$  can be estimated to an accuracy*  
 648 *of less than  $O(\eta/i)$  by using  $\text{poly}((O(1)/\eta\alpha)^{1/\eta}, \log(1/\delta\alpha\eta))$  samples from  $\xi + z$  and*  
 649  *$\xi + z'$ .*

650 We defer the proof of [Claim C.4](#) to [Appendix C.2](#), and continue with our proof showing that  
 651  $\mathbf{E}[\xi + z \mid |\xi + z| \leq A\sigma k] \approx \mathbf{E}[\xi \mid |\xi| \leq A\sigma k]$  for  $k$  satisfying the conclusions of [Claim C.4](#). To this  
 652 end, observe the following for  $f(\xi, z)$  being either 1 or  $\xi + z$ .

$$|\mathbf{E}[f(\xi, z) \mathbf{1}(|\xi| \leq \sigma i)] - \mathbf{E}[f(\xi, z) \mathbf{1}(|\xi + z| \leq \sigma i)]| \\ \leq |\mathbf{E}[f(\xi, z) \mathbf{1}(|\xi + z| > \sigma i) \mathbf{1}(|\xi| \leq \sigma i)]| + |\mathbf{E}[f(\xi, z) \mathbf{1}(|\xi + z| \leq \sigma i) \mathbf{1}(|\xi| > \sigma i)]|.$$

653 By setting  $f(\xi, z) := 1$  and considering the case where  $i = k$  satisfies the conclusions of [Claim C.4](#),  
 654 we can bound the “error terms”

655  $\Pr[|\xi + z| \leq A\sigma k \text{ and } |\xi| > A\sigma k] \text{ and } \Pr[|\xi + z| > A\sigma k \text{ and } |\xi| \leq A\sigma k]$  in terms of  $\tilde{P}(k)$ .

656 Furthermore,  $\tilde{P}(k)$  itself is upper bounded by  $O(\eta/k)(\Pr[|\xi + z| \leq A\sigma k] + \Pr[|\xi + z'| \leq A\sigma k])$  as  
 657 per [Item 2](#) and [Item 3](#). Putting these facts together, we have that

$$|\Pr[|\xi| \leq A\sigma k] - \Pr[|\xi + z| \leq A\sigma k]| \\ = O(\eta/k)(\Pr[|\xi + z| \leq A\sigma k] + \Pr[|\xi + z'| \leq A\sigma k]).$$

658 A similar claim holds for the distribution over  $z'$ . An application of the triangle inequality now  
 659 implies

$$\begin{aligned} & |\Pr[|\xi + z'| \leq A\sigma k] - \Pr[|\xi + z| \leq A\sigma k]| \\ &= O(\eta/k) (\Pr[|\xi + z| \leq A\sigma k] + \Pr[|\xi + z'| \leq A\sigma k]). \end{aligned}$$

660 If  $|A - B| < \tau(A + B)$  it follows that  $(1 - \tau)/(1 + \tau) < A/B < (1 + \tau)/(1 - \tau)$ . For  $\tau \in (0, 1/2]$ ,  
 661 this means  $A = \Theta(B)$ . Applying this to our case, we can conclude that  $\Pr[|\xi + z'| \leq A\sigma k] =$   
 662  $\Theta(\Pr[|\xi + z| \leq A\sigma k])$ . Substituting this equivalence back into the previous expression, we obtain:

$$|\Pr[|\xi| \leq A\sigma k] - \Pr[|\xi + z| \leq A\sigma k]| = O(\eta/k) (\Pr[|\xi + z| \leq A\sigma k]). \quad (1)$$

663 Similarly, when  $f(\xi, z) := \xi + z$ , we need to control the error terms:  $\mathbf{E}[(\xi + z) \mathbf{1}(|\xi + z| \leq$   
 664  $A\sigma k) \mathbf{1}(|\xi| > A\sigma k)]$  and  $\mathbf{E}[(\xi + z) \mathbf{1}(|\xi + z| > A\sigma k) \mathbf{1}(|\xi| \leq A\sigma k)]$ .

665 Observe that  $(\xi + z) \mathbf{1}(|\xi + z| \leq A\sigma k) \mathbf{1}(|\xi| > A\sigma k)$  has a nonzero value with probability at most  
 666  $\mathbf{E}[\mathbf{1}(|\xi + z| \leq A\sigma k) \mathbf{1}(|\xi| > A\sigma k)] < \tilde{P}(k)$ . Also, the magnitude of  $(\xi + z)$  in this event is at most  
 667  $A\sigma k$ . Putting these together, we get that

$$|\mathbf{E}[(\xi + z) \mathbf{1}(|\xi + z| \leq A\sigma k) \mathbf{1}(|\xi| > A\sigma k)]| < A\sigma k \tilde{P}(k) < O(A\sigma\eta) \sum_{j=1}^k \tilde{P}(j).$$

668 Unfortunately, we cannot use the same argument to bound  $\mathbf{E}[(\xi + z) \mathbf{1}(|\xi + z| > A\sigma k) \mathbf{1}(|\xi| \leq A\sigma k)]$ ,  
 669 since  $|\xi + z|$  is no longer bounded by  $A\sigma k$  in this event. However, we can break the sum  $\xi + z$  as  
 670 follows:  $\xi + z = \xi + z\mathbf{1}(|z| > A\sigma k) + z\mathbf{1}(|z| \leq A\sigma k)$ . This allows us to get the following bound:

$$\begin{aligned} & \mathbf{E}[(\xi + z) \mathbf{1}(|\xi + z| > A\sigma k) \mathbf{1}(|\xi| \leq A\sigma k)] \\ & < 2A\sigma k \tilde{P}(k) + \mathbf{E}[z \mathbf{1}(|z| > A\sigma k) \mathbf{1}(|\xi + z| > A\sigma k) \mathbf{1}(|\xi| \leq A\sigma k)] \\ & < 2A\sigma k \tilde{P}(k) + \mathbf{E}[z \mathbf{1}(|z| > A\sigma k)] \\ & < 2A\sigma k \tilde{P}(k) + A\sigma/k \\ & < O(A\eta\sigma \sum_{j=1}^k \tilde{P}(j)) + O(A\eta\sigma\alpha), \end{aligned}$$

671 where the third inequality follows by an application of Chebyshev's inequality, and the final inequality  
 672 follows by choosing  $k \geq 1/(\eta\alpha)$ .

673 Putting everything together, we see

$$\mathbf{E}[(\xi + z) \mathbf{1}(|\xi + z| \leq A\sigma k)] = \mathbf{E}[(\xi + z) \mathbf{1}(|\xi| \leq A\sigma k)] \pm O(A\sigma\eta\alpha + A\sigma\eta \sum_{j=1}^k \tilde{P}(j)). \quad (2)$$

674 To finally compute the conditional probability, we use Equation (1) and Equation (2) to get

$$\begin{aligned} \mathbf{E}[(\xi + z) \mid |\xi| \leq A\sigma k] &= \frac{\mathbf{E}[(\xi + z) \mathbf{1}(|\xi + z| \leq A\sigma k)] \pm O(A\sigma\eta\alpha + A\sigma\eta \sum_{j=1}^k \tilde{P}(j))}{\Pr[|\xi| \leq A\sigma k]} \\ &= \frac{\mathbf{E}[(\xi + z) \mathbf{1}(|\xi + z| \leq A\sigma k)] \pm O(A\sigma\eta\alpha + A\sigma\eta \sum_{j=1}^k \tilde{P}(j))}{(1 + \Theta(\eta/k)) \Pr[|\xi + z| \leq A\sigma k]} \\ &= (1 - \Theta(\eta/k)) \mathbf{E}[(\xi + z) \mid |\xi + z| \leq A\sigma k] \\ & \quad \pm O(1) \frac{A\sigma\eta\alpha + A\sigma\eta \Pr[|\xi + z| \leq A\sigma k]}{\Pr[|\xi + z| \leq A\sigma k]} \\ &= \mathbf{E}[(\xi + z) \mid |\xi + z| \leq A\sigma k] \pm O(A\eta\sigma), \end{aligned}$$

675 where the second inequality is a consequence of Item 3, and the last is due to the fact that  $\Pr[|\xi + z| \leq$   
 676  $A\sigma k] \geq \alpha/2$  whenever  $k > 2$ , which follows from an application of Fact A.3 while noting the fact  
 677 that  $\Pr[\xi = 0] \geq \alpha$ .

678 Taking a difference for the above calculations for  $z$  and  $z'$ , we see that,

$$\mathbf{E}[(\xi + z) \mid |\xi + z| \leq A\sigma k] - \mathbf{E}[(\xi + z') \mid |\xi + z'| \leq A\sigma k] = \mathbf{E}[z] - \mathbf{E}[z'] \pm O(A\eta\sigma).$$

679 Consider this final error, and let  $O(A\eta\sigma) < CA\eta\sigma$  for some constant  $C$ . Repeating the above  
 680 argument initially setting  $\eta = \eta'/C$ , where  $C$  is the constant gives us the guarantee we need.

681 Finally, we estimate the runtime and sample complexity of our algorithm. The main bottleneck in our  
 682 algorithm is the repeated estimation of  $\tilde{P}(i)$  and estimation of  $\mathbf{E}[(\xi + z) \mid |\xi + z| \leq A\sigma k]$ .

683 According to [Item 4](#), each time we estimate  $\tilde{P}(i)$  to the desired accuracy, we draw  
 684  $\text{poly}((O(1)/\alpha\eta)^{1/\eta}, \log(1/\delta\eta\alpha))$  samples.

685 An application of Hoeffding's inequality ([Lemma A.1](#)) then allows us to estimate the con-  
 686 ditional expectation  $\mathbf{E}[(\xi + z) \mid |\xi + z| \leq A\sigma k]$  to an accuracy of  $\eta A\sigma$  by drawing  
 687  $\text{poly}((O(1)/\alpha\eta)^{1/\eta}, \log(1/\delta\eta\alpha))$  samples as well. The exponential dependence here comes from  
 688 the exponential upper bound on  $k$ .

689 □

## 690 C.2 Proof of [Claim C.4](#)

691 In this section, we prove the existence of  $\tilde{P}(\cdot)$  which is an upper bound on  $P(i, z) + P(i, z')$ , which  
 692 we can estimate using samples from  $\xi + z$  and  $\xi + z'$ .

693 *Proof of [Claim C.4](#)*

694 *Proof of [Item 1](#):*

695 Recall the definition of  $P(i, z)$ .

$$\begin{aligned} P(i, z) &:= \Pr[|\xi| \in A\sigma(i-1, i+1)] \\ &\quad + \Pr[|\xi| < Ai\sigma, |\xi + z| > Ai\sigma] + \Pr[|\xi| > Ai\sigma, |\xi + z| < Ai\sigma]. \end{aligned}$$

696 For [Item 1](#) to hold, we need to define  $\tilde{P}(i)$  to be an upper bound on  $P(i, z) + P(i, z')$  which can be  
 697 computed using samples from  $\xi + z$  and  $\xi + z'$ . To this end, we bound  $P(i, z)$  as follows. First, note  
 698 that we can adjust the endpoints of the intervals to get

$$\begin{aligned} P(i, z) &< 3 \Pr[|\xi| \in A\sigma(i-1, i+1)] \\ &\quad + \Pr[|\xi| < A(i-1)\sigma, |\xi + z| > Ai\sigma] + \Pr[|\xi| > A(i+1)\sigma, |\xi + z| < Ai\sigma]. \end{aligned}$$

699 Then, we partition the ranges in the definition above into intervals of length  $A\sigma$  to get:

$$\begin{aligned} P(i, z) &< 3 \Pr[|\xi| \in A\sigma(i-1, i+1)] \\ &\quad + \sum_{j=1}^{i-2} \Pr[|\xi| \in Aj\sigma + [0, A\sigma), |\xi + z| > Ai\sigma] \\ &\quad + \sum_{j=1}^{i-1} \Pr[|\xi| > A(i+1)\sigma, |\xi + z| \in Aj\sigma + [0, A\sigma)]. \end{aligned}$$

700 Next, an application of the triangle inequality to  $|\xi| \in Aj\sigma + [0, A\sigma)$  and  $|\xi + z| > Ai\sigma$  implies  
 701 that  $|z| \geq A(i-j-1)\sigma$ . Similarly, the same kind of argument when  $|\xi| > A(i+1)\sigma$  and  
 702  $|\xi + z| \in Aj\sigma + [0, A\sigma)$  demonstrates that  $|z| = |\xi + z - \xi| \geq A(i-j)\sigma$ . We then use [Fact A.3](#)  
 703 to move from  $|\xi + z|$  to  $|\xi|$  in the third term.

$$\begin{aligned} P(i, z) &< 3 \Pr[|\xi| \in A\sigma(i-1, i+1)] \\ &\quad + \sum_{j=1}^{i-2} \Pr[|\xi| \in Aj\sigma + A\sigma[0, 1), |z| \geq (i-j-1)A\sigma] \\ &\quad + O(1) \sum_{j=1}^{i-1} \Pr[|\xi| \in Aj\sigma + A\sigma[-2, 3), |z| \geq (i-j)A\sigma]. \end{aligned}$$

704 An application of Chebyshev's inequality to  $z$ , using the independence of  $z$  and  $\xi$ , gives that

$$\begin{aligned} P(i, z) &< 3 \Pr[|\xi| \in A\sigma(i-1, i+1)] \\ &\quad + O(1) \sum_{j=1}^{i-2} (1/(i-j-1)^2) \Pr[|\xi| \in Aj\sigma + A\sigma[0, 1]] \\ &\quad + O(1) \sum_{j=1}^{i-1} (1/(i-j)^2) \Pr[|\xi| \in Aj\sigma + A\sigma[-2, 3]] . \end{aligned}$$

705 Another application of **Fact A.3** applied to  $(\xi + z) - z$  then gives us

$$\begin{aligned} P(i, z) &< 3 \Pr[|\xi| \in A\sigma(i-5, i+5)] \\ &\quad + O(1) \sum_{j=1}^{i-2} (1/(i-j-1)^2) \Pr[|\xi + z| \in Aj\sigma + A\sigma[-2, 3]] \\ &\quad + O(1) \sum_{j=1}^{i-1} (1/(i-j)^2) \Pr[|\xi + z| \in Aj\sigma + A\sigma[-4, 5]] . \end{aligned}$$

706 Finally, extending all intervals so that they match, and observing that  $\sum_{j=1}^{i-2} (1/(i-j-1)^2) \Pr[|\xi + z| \in Aj\sigma + A\sigma[-2, 3]] \leq \sum_{j=1}^{i-1} (1/(i-j)^2) \Pr[|\xi + z| \in Aj\sigma + A\sigma[-4, 5]]$ , we get

$$\begin{aligned} P(i, z) &< O(1) \Pr[|\xi| \in A\sigma(i-5, i+5)] \\ &\quad + O(1) \sum_{j=1}^{i-1} (1/(i-j)^2) \Pr[|\xi + z| \in Aj\sigma + A\sigma[-4, 5]] . \end{aligned}$$

708 We now let  $\tilde{P}(i, z)$  denote the final upper bound on  $P(i, z)$ . The value of having  $\tilde{P}(i, z)$  is that it can  
709 be computed using samples from  $\xi + z$ .

$$\begin{aligned} \tilde{P}(i, z) &:= O(1) \Pr[|\xi| \in A\sigma(i-5, i+5)] \\ &\quad + O(1) \sum_{j=1}^{i-1} (1/(i-j)^2) \Pr[|\xi + z| \in Aj\sigma + A\sigma[-4, 5]] . \end{aligned}$$

710 We defined  $\tilde{P}(i) = \tilde{P}(i, z) + \tilde{P}(i, z')$ .

711 *Proof of **Item 2**:*

712 First observe that  $\sum_{i=1}^{\infty} \tilde{P}(i) < C$  for some constant  $C$ . It is clear that this is true of the first term,  
713 since every interval will get over-counted at most 10 times. To see that the second term can be  
714 bounded, observe that

$$\begin{aligned} &\sum_{i=1}^{\infty} \sum_{j=1}^{i-1} (1/(i-j)^2) \Pr[|\xi + z| \in Aj\sigma + A\sigma[-4, 5]] \\ &< \sum_{j=1}^{\infty} \sum_{i=1}^{\infty} (1/(i-j)^2) \Pr[|\xi + z| \in Aj\sigma + A\sigma[-4, 5]] \\ &< \sum_{j=1}^{\infty} \Pr[|\xi + z| \in Aj\sigma + A\sigma[-4, 5]] \sum_{i=1}^{\infty} (1/(i-j)^2) = O(1) . \end{aligned}$$

715 The first inequality follows by extending the limits of summation.

716 The final inequality follows from the fact that the total probability is at most 1, every interval of size  
717  $\sigma$  gets over-counted at most finitely many times, and the fact that  $\sum_{k=1}^{\infty} 1/k^2 = O(1)$ .

718 **Item 2** now follows from the fact that  $\tilde{P}(i)$ ,  $i \geq 1$  is a positive sequence that sums to a finite quantity,  
719 and  $\tilde{P}(1) \geq \alpha/2$ , since the interval  $\tilde{P}(1)$  upper bounds is contains at least a constant fraction of the  
720 mass of  $\xi$  at 0 that is moved by  $z, z'$ , and  $\Pr[\xi = 0] \geq \alpha$ .

721 Applying [Lemma B.2](#), we get our result.

722 *Proof of Item 3:*

723 Let  $k$  be such that [Item 2](#) holds, i.e.  $k\tilde{P}(k) < \eta \sum_{j=1}^k \tilde{P}(k)$ , then the goal is to show  $\sum_{j=1}^k \tilde{P}(k) =$   
 724  $O(\Pr[|\xi + z| < A\sigma k] + \Pr[|\xi + z'| < A\sigma k])$ .

725 We first consider the sum over  $i$ , of  $\tilde{P}(i, z)$ . It is easy to see that this is

$$\begin{aligned} \sum_{i=1}^k \tilde{P}(i, z) &= O(1) \Pr[|\xi + z| \leq A\sigma(k+5)] \\ &\quad + O(1) \sum_{i=1}^k \sum_{j=1}^{i-1} (1/(i-j)^2) \Pr[|\xi + z| \in Aj\sigma + A\sigma[-4, 5]] . \end{aligned}$$

726 The first term on the RHS is almost what we want. We now show how to bound the second term,

$$\begin{aligned} &\sum_{i=1}^k \sum_{j=1}^{i-1} (1/(i-j)^2) \Pr[|\xi + z| \in Aj\sigma + A\sigma[-4, 5]] \\ &< \sum_{j=1}^{k-1} \sum_{i=0; i \neq j}^k (1/(i-j)^2) \Pr[|\xi + z| \in Aj\sigma + A\sigma[-4, 5]] \\ &= \sum_{j=1}^{k-1} \Pr[|\xi + z| \in Aj\sigma + A\sigma[-4, 5]] \sum_{i=0; i \neq j}^k (1/(i-j)^2) \\ &< O(1) \sum_{j=1}^{k-1} \Pr[|\xi + z| \in Aj\sigma + A\sigma[-4, 5]] \\ &< O(1) \Pr[|\xi + z| < A(k+5)\sigma] . \end{aligned}$$

727 The first inequality holds since any pair of  $(i, j)$  that has a nonzero term in the first sum will also  
 728 occur in the second sum, and all terms are non-negative.

729 The second equality is just pulling the common  $j$  term out.

730 The third inequality follows from the fact that  $\sum_{i=1}^{\infty} 1/i^2 = O(1)$ .

731 The fourth inequality follows from the fact that each  $\sigma$ -length interval is overcounted at most a  
 732 constant number of times.

733 This allows us to bound  $\sum_{i=1}^k \tilde{P}(i, z)$  by  $O(\Pr[|\xi + z| < A\sigma(k+5)])$  overall. Similarly for  
 734  $\sum_{i=1}^k \tilde{P}(i, z')$ , we can obtain a bound of  $O(\Pr[|\xi + z'| < A\sigma(k+5)])$ . Putting these together, we  
 735 see  $\sum_{i=1}^k \tilde{P}(i) \leq O(\Pr[|\xi + z| < A\sigma(k+5)] + \Pr[|\xi + z'| < A\sigma(k+5)])$ . Finally, to get the upper  
 736 bound claimed in [Item 3](#), observe that

$$\begin{aligned} &\Pr[|\xi + z| < A\sigma(k+5)] + \Pr[|\xi + z'| < A\sigma(k+5)] \\ &= \Pr[|\xi + z| < A\sigma(k-4)] + \Pr[|\xi + z'| < A\sigma(k-4)] \\ &\quad + \Pr[|\xi + z| \in A\sigma(k-4, k+5)] + \Pr[|\xi + z'| \in A\sigma(k-4, k+5)] \\ &\leq \Pr[|\xi + z| < A\sigma(k-4)] + \Pr[|\xi + z'| < A\sigma(k-4)] \\ &\quad + \tilde{P}(k) \\ &\leq \Pr[|\xi + z| < A\sigma(k-4)] + \Pr[|\xi + z'| < A\sigma(k-4)] \\ &\quad + O(\eta/k)(\Pr[|\xi + z| < A\sigma(k+5)] + \Pr[|\xi + z'| < A\sigma(k+5)]) . \end{aligned}$$

737 Rearranging the inequality and by scaling  $\eta$  such that  $O(\eta/k) \leq 1/2$ , we see that  $\Pr[|\xi + z| <$   
 738  $A\sigma(k+5)] + \Pr[|\xi + z'| < A\sigma(k+5)] = O(\Pr[|\xi + z| < A\sigma(k-4)] + \Pr[|\xi + z'| < A\sigma(k-4)]) =$   
 739  $O(\Pr[|\xi + z| < A\sigma k] + \Pr[|\xi + z'| < A\sigma k])$ , completing our proof of [Item 3](#).

740 *Proof of Item 4:*

Finally, to see [Item 4](#) holds, observe that  $0 < \tilde{P}(i) < O(1)$ . Let  $B = (O(1)/\eta\alpha)^{1/\eta}$  denote the maximum index before which we can find a  $k$  such that  $k\tilde{P}(k) \leq \eta \sum_{i=1}^k \tilde{P}(i)$ . Now, To estimate  $\tilde{P}(i)$  empirically, we partition the interval  $(-BA\sigma, BA\sigma)$  into  $B$  intervals of length  $A\sigma$  each, and estimate the probability of  $\xi + z$  falling in each interval. If we estimate each of these probabilities to an accuracy of  $\eta/(100B)$ , we can estimate  $\tilde{P}(i)$  to an accuracy of  $O(\eta/i)$ .

An application of Hoeffding's inequality ([Lemma A.1](#)) tells us that each estimate will require  $O(B^2/\eta^2 \log(1/\delta))$  samples. Taking a union bound over all these intervals, we see that we will require  $O(B^2/\eta^2 \log(B/\delta))$  samples.

Finally, another union bound over each  $i \in [0, B]$  implies that we will need  $O(B^2/\eta^2 \log(B^2/\delta))$  samples. Substituting the value of  $B$  back in, we see that this amounts to requiring  $(O(1)/\eta\alpha)^{2/\eta} \log(1/\eta\alpha\delta)$  samples.

Estimating  $\tilde{P}(i)$  will take time polynomial in the number of samples, and so we take time  $\tilde{O}(O(1)/\eta\alpha)^{O(1/\eta)}$ .  $\square$

### C.3 High-dimensional Noisy Location Estimation

In this section, we explain how to use our one-dimensional location estimation algorithm to get an algorithm for noisy location estimation in  $d$  dimensions.

The algorithm performs one-dimensional location estimation coordinate-wise, after a random rotation.

We need to perform such a rotation to ensure that every coordinate has a known variance bound of  $\sigma/\sqrt{d}$ .

---

#### Algorithm 5 High-dimensional Location Estimation: ShiftHighD( $S_1, S_2, \eta, \sigma, \alpha$ )

---

**input:** Sample sets  $S_1, S_2 \subset \mathbb{R}^d$  of size  $m, \eta \in (0, 1), \sigma > 0, \alpha$

1. Sample  $R_{i,j}$  i.i.d. from the uniform distribution over  $\{\pm 1/\sqrt{d}\}$  for  $i, j \in [d]$
  2. Represent  $S_1$  and  $S_2$  in the basis given by the rows of  $R$ :  $r_1, \dots, r_d$ .
  3. **for**  $i \in [d]$  **do**
    - |  $v'_i := \text{Shift1D}(S_1 \cdot e_i, S_2 \cdot e_i, \eta, O(\sigma/\sqrt{d}), \alpha)$
  - end**
  4. Change the representation of  $v'$  back to the standard basis.
  5. *Probability Amplification:* Repeat steps 1-4,  $T := O(\log(1/\delta))$  times to get  $C := \{v'_1, \dots, v'_T\}$
  6. Find a ball of radius  $O(\eta\sigma)$  centered at one of the  $v'_i$  containing  $> 90\%$  of  $C$ . If such a vector exists, set  $v'$  to be this vector. Otherwise set  $v'$  to be an arbitrary element of  $C$ .
  5. **Return**  $v'$ .
- 

**Lemma C.5** (Location Estimation). *Let  $y_i := \xi + z_i$  for  $i \in \{1, 2\}$  where  $\Pr[\xi = 0] \geq \alpha$  and  $z_i \sim D_i$  are distributions over  $\mathbb{R}^d$  satisfying  $\mathbf{E}_{D_i}[x] = 0$  and  $\mathbf{E}_{D_i}[\|x\|^2] \leq \sigma^2$ . Let  $v \in \mathbb{R}^d$  be an unknown shift. There is an algorithm ([Algorithm 5](#)), which draws  $m = \text{poly}((O(1)/\eta\alpha)^{1/\eta}, \log(1/\delta\epsilon\alpha))$  samples each from  $y_1$  and  $y_2 + v$ , runs in time  $\text{poly}(d, (O(1)/\eta\alpha)^{1/\eta}, \log(1/\delta\epsilon\alpha))$  and returns  $v'$  satisfying  $\|v' - v\| \leq O(\eta\sigma)$  with probability  $1 - \delta$ .*

*Proof.* Consider a matrix  $R$  whose entries  $R_{i,j}$  are independently drawn from the uniform distribution over  $\pm 1/\sqrt{d}$ . and whose diagonals are  $1/\sqrt{d}$ .

Our goal is to show that with probability at least 99%, the standard deviation of each coordinate of  $Rz$  is bounded by  $O(\sigma/\sqrt{d})$ , i.e., the standard deviation of  $Rz \cdot e_i$  is at most  $O(\sigma/\sqrt{d})$  for all integer  $i$  in  $[d]$ .

We can then amplify this probability to ensure that the algorithm fails with a probability that is exponentially small.

772 To see this, observe that  $Rz \cdot e_i = r_i \cdot z$ , and so  $\mathbf{E}_z[r_i \cdot z] = 0$ .

$$\begin{aligned} \mathbf{E}_z[(r_i \cdot z)^2] &= \sum_{p \in [d], q \in [d]} R_{i,p} R_{i,q} \mathbf{E}[z_p z_q] \\ &= \sum_{i=1}^d \mathbf{E}[z_i^2]/d + 2 \sum_{p,q \in [d], p < q} R_{i,p} R_{i,q} \mathbf{E}[z_p z_q] \\ &\leq (\sigma^2/d) + 2 \sum_{p,q \in [d], p < q} R_{i,p} R_{i,q} \mathbf{E}[z_p z_q]. \end{aligned}$$

773 We now bound the second term with probability 99% via applying Chebyshev's inequality. Observe  
 774 that  $\mathbf{E}[z_p z_q] \leq \sqrt{\mathbf{E}[z_p^2] \mathbf{E}[z_q^2]} \leq \sigma^2$ . Since  $R_{i,p}$  and  $R_{i,q}$  are drawn independently and  $p \neq q$ , we see  
 775 that the variables  $R_{i,p} R_{i,q}$  and  $R_{i,l} R_{i,m}$  pairwise independent for pairs  $(p, q) \neq (l, m)$ , this implies  
 776  $\Pr[\sum_{p,q \in [d], p < q} R_{i,p} R_{i,q} \mathbf{E}[z_p z_q] > T] \leq \frac{O(\sigma^4)}{d^2 T^2}$ . By choosing  $T = O(\sigma^2/d)$ , we see that the  
 777 right-hand side above is at most  $0.001/d$ .

778 A union bound over all the coordinates then tells us that with probability 99%, the variance of each  
 779 coordinate is at most  $O(\sigma^2/d)$ .

780 Then, for each coordinate  $i$ , we can identify  $v'_i = v_i \pm O(\eta\sigma/\sqrt{d})$  through an application of  
 781 **Lemma 3.1**. Putting these together with probability at least 99%, we find  $v'$  satisfying  $\|v' - v\|^2 \leq$   
 782  $O(\eta^2 \sigma^2)$ .

783 Changing between these basis representations maintains the quality of our estimate since the new  
 784 basis contains unit vectors nearly orthogonal to each other. With high probability, the inner products  
 785 between these are around  $O(1/\sqrt{d})$  for every pairwise comparison, so  $R$  approximates a random  
 786 rotation.

787 *Probability Amplification:* The current guarantee ensures that we obtain a good candidate with a  
 788 constant probability of success. However, for the final algorithmic guarantee, we need a higher  
 789 probability of success. To achieve this, we modify the algorithm as follows:

- 790 1. Run the algorithm  $T$  times, each time returning a candidate  $v'_i$  that is, with probability 99%,  
 791 within  $O(\eta\sigma)$  distance from the true solution.
- 792 2. Construct a list of candidates  $C = \{v'_1, \dots, v'_T\}$ .
- 793 3. Identify a ball of radius  $O(\sigma\eta)$  centered at one of the  $v'_i$  that contains at least 90% of the  
 794 remaining points.
- 795 4. Return the corresponding  $v'_i$  as the final output.
- 796 5. If no such  $v'_i$  exists, return any vector from  $C$ .

797 Let  $E$  denote the event that a point is within  $O(\eta\sigma)$  to the true solution.

798 This will succeed with probability  $1 - \exp(-T)$ . To see why, observe the chance that we re-  
 799 cover  $(2/3)T$  vectors outside the event  $E$  is less than  $(0.01)^{2/3 T} \binom{T}{2/3 T} < (0.047)^T \binom{T}{T/2} <$   
 800  $(0.047)^T (2^T/\sqrt{T}) < (0.095)^T$ .  $\square$

## 801 **D List-Decodable Mean Estimation**

802 This section presents an algorithm for list-decodable mean estimation when the inlier distribution  
 803 follows  $\mathcal{D}_\sigma$ . Here,  $\mathcal{D}_\sigma$  represents a set of distributions over  $\mathbb{R}^d$  defined as  $\mathcal{D}_\sigma := \{D \mid \mathbf{E}_D[\|x -$   
 804  $\mathbf{E}_D[x]\|^2] \leq \sigma^2\}$ . In our setting, we receive samples from  $\xi + z$ , where  $\Pr[\xi = 0] > \alpha$ , where  $\alpha$  can  
 805 be close to 0. Our objective is to estimate the mean with a high degree of precision.

806 Note that the guarantees provided by prior work do not directly apply to our setting. Prior work  
 807 examines a more aggressive setting where arbitrary outliers are drawn with a probability of  $1 - \alpha$ .  
 808 These outliers might not have the additive structure we have.

809 Recall the definition of an  $(\alpha, \beta, s)$ -LDME algorithm:

810 **Definition D.1** (Algorithm for List-Decodable Mean Estimation). *Algorithm  $\mathcal{A}$  is an  $(\alpha, \beta, s)$ -LDME*  
811 *algorithm for  $\mathcal{D}$  (a set of candidate inlier distributions) if with probability  $1 - \delta_{\mathcal{A}}$ , it returns a list  $\mathcal{L}$*   
812 *of size  $s$  such that  $\min_{\hat{\mu} \in \mathcal{L}} \|\hat{\mu} - \mathbf{E}_{x \sim D}[x]\| \leq \beta$  for  $D \in \mathcal{D}$  when given  $m_{\mathcal{A}}$  samples of the kind  $z + \xi$*   
813 *for  $z \sim D$  and  $\Pr[\xi = 0] \geq \alpha$ . If  $1 - \alpha$  is a sufficiently small constant less than  $1/2$ , then  $s = 1$ .*

814 We now prove [Fact 2.1](#) which we restate below for convenience.

815 **Fact D.2** (List-decoding algorithm). *There is an  $(\alpha, \eta\sigma, \tilde{O}((1/\alpha)^{2/\eta^2}))$ -LDME<sup>3</sup> algorithm for the*  
816 *inlier distribution belonging to  $\mathcal{D}_{\sigma}$  which runs in time  $\tilde{O}(d(1/\alpha)^{2/\eta^2})$  and succeeds with probability*  
817  *$1 - \delta$ . Conversely, any algorithm which returns a list, one of which makes an error of at most  $O(\eta\sigma)$*   
818 *in  $\ell_2$  norm to the true mean, must have a list whose size grows exponentially in  $1/\eta$ .*

819 *If  $1 - \alpha$  is a sufficiently small constant less than half, then the list size is 1 to get an error of*  
820  *$O(\sqrt{1 - \alpha} \sigma)$ .*

821 **Proof. Algorithm:** Consider the following algorithm:

- 822 1. If  $\alpha < c$  and  $\eta > \sqrt{\alpha}$ : Run any stability-based robust mean estimation algorithm from [\[10\]](#)  
823 and return a singleton list containing the output of the algorithm.
- 824 2. Otherwise, for integer each  $i \in [1, 100(1/\alpha)^{2/\eta^2} \log(1/\delta)^2]$  sample  $1/\eta^2$  samples and let  
825 their mean be  $\mu_i$ .
- 826 3. Return the list  $\mathcal{L} = \{\mu_i \mid i \in [1, 100(1/\alpha)^{2/\eta^2} \log(1/\delta)^2]\}$ .

827 If the algorithm returns in the first step, then the guarantees follow from the guarantees of the  
828 algorithm for robust mean estimation from [\[10\]](#) (Proposition 1.5 on page 4).

829 Otherwise, observe that the probability that every one of  $1/\eta^2$  samples drawn is an inlier, is  $\alpha^{1/\eta^2}$ .

830 Hence, with probability  $1 - \delta$  we see that if we draw  $1/\eta^2$  samples  $O((1/\alpha)^{2/\eta^2} \log(1/\delta)^2)$  times,  
831 there are at least  $O(\log(1/\delta))$  sets of samples containing only inliers. Then, the mean of one of these  
832 concentrates to an error of  $O(\eta\sigma)$  by an application of [Lemma A.2](#). More precisely, [Lemma A.2](#)  
833 ensures that with probability 99%, the mean of a set of  $1/\eta^2$  inliers concentrates up to an error of  
834  $O(\eta\sigma)$ . Repeating this  $\log(1/\delta)$  times, and hence get our result.

835 **Hardness:** To see that the list size must be at least  $\exp(1/\eta)$ , consider the set of inlier distributions  
836 given by  $\{D_s \mid s \in \{\pm 1\}^d\}$  where each  $D_s$  is defined as follows:  $D_s$  is a distribution over  $\mathbb{R}^d$  such  
837 that each coordinate independently takes the value  $s_i$  with probability  $1/d$ , and 0 otherwise.

838 Each  $D_s$  defined above belongs to  $\mathcal{D}_{\sqrt{1-1/d}}$  since  $\mathbf{E}_{x \sim D_s}[x] = s/d$  and

$$\begin{aligned} \sigma^2 &:= \mathbf{E}_{x \sim D_s} [\|x - s/d\|^2] = \sum_{i=1}^d \mathbf{E}_{x_i \sim (D_s)_i} [(x_i - s_i/d)^2] \\ &= \sum_{i=1}^d (1 - 1/d)(1/d)^2 + (1/d)(1 - 1/d)^2 = (1 - 1/d). \end{aligned}$$

839 We will set the oblivious noise distribution for each  $D_s$  to be  $-D_s$ . Our objective is to demonstrate  
840 that the distribution of  $D_s - D_s$  is the same for all  $s$  and is independent of  $s$ . This means that we  
841 cannot identify  $s$  by seeing samples from  $D_s - D_s$ .

842 Then, since the means of  $D_s$  and  $D_{s'}$  for any distinct pair  $s, s' \in \{\pm 1\}^d$  differ by at least  $1/d$ , if we  
843 set  $d = 1/\eta$  we see that there are  $2^{1/\eta}$  possible different values of the original mean, each pair being  
844 at least  $\eta$  far apart, which is larger than  $\eta\sigma^2 = \eta(1 - \eta)$ .

845 We can assume, without loss of generality, that  $s = \mathbf{1}$ , where  $\mathbf{1}$  represents the all-ones vector. Each  
846 coordinate of  $D_s$  can be viewed as a random coin flip, taking the value 0 with probability  $1 - 1/d$   
847 and 1 with probability  $1/d$ .

---

<sup>3</sup>Typo in main body:  $\eta$  instead of the correct  $\eta\sigma$ .

848 The probability of obtaining the all-zeros vector is given by  $(1 - 1/d)^d$ , which approaches a constant  
 849 value for sufficiently large  $d$ , and so,  $\Pr_{x \sim D_s}[x = 0] \geq 0.001$ , i.e., the  $\alpha$  for the oblivious noise is at  
 850 least a constant. In fact, it can be as large as  $1/e > 0.35$  for large enough  $d$ .

851 Let the oblivious noise be  $-D$ . Now, consider the distribution of  $x + y$ , where  $x$  follows the  
 852 distribution  $D$  and  $y$  follows the distribution  $-D$ . If we focus on the first coordinate,  $x_1 + y_1$ , we  
 853 observe that it follows a symmetric distribution over  $\{-1, 0, 1\}$  which does not depend on  $s_1$ . Also,  
 854 each coordinate exhibits the same distribution, and they are drawn independently of one another.  
 855 Hence, the final distribution is independent of  $s$ , so we get our result.  $\square$

## 856 E Proof of Corollary 4.2

857 Below, we restate Corollary 4.2 for convenience.

858 **Corollary E.1.** *Given access to oblivious noise oracle  $\mathcal{O}_{\alpha, \sigma, f}$ , a  $(O(\eta\sigma), \epsilon)$ -inexact-learner  $\mathcal{A}_G$   
 859 running in time  $T_G$ , there exists an algorithm that takes  $\text{poly}((1/\alpha)^{1/\eta^2}, (O(1)/\eta)^{1/\eta}, \log(T_G/\delta\eta\alpha))$   
 860 samples, runs in time  $T_G \cdot \text{poly}(d, (1/\alpha)^{1/\eta^2}, (O(1)/\eta)^{1/\eta}, \log(1/\eta\alpha\delta))$ , and with probability  $1 - \delta$   
 861 returns a list  $\mathcal{L}$  of size  $\tilde{O}((1/\alpha)^{1/\eta^2})$  such that  $\min_{x \in \mathcal{L}} \|\nabla f(x)\| \leq O(\eta\sigma) + \epsilon$ . Additionally, the  
 862 exponential dependence on  $1/\eta$  in the list size is necessary.*

863 *Proof.* This follows by substituting the guarantees of Fact 2.1 for the algorithm  $\mathcal{A}_{ME}$  in Theorem 1.4.  
 864  $\square$
